# Supplementary material for: Staphylococcus aureus Small Colony Variants (SCVs): News From a Chronic Prosthetic Joint Infection
Source: Front Cell Infect Microbiol. 2019 Oct 22;9:363. doi: 10.3389/fcimb.2019.00363 (PMC6817495; doi:10.3389/fcimb.2019.00363)
Supplement: Supplementary file 2 [file Table_2.xls]

## Sheet: Mobile Genetic Elements
Strain	Isolate	GI	GI associated genes			ф	ф associated genes				Tn	Tn associated genes		IS
			super-antigen like genes	enterotoxins	restriction system		relevant genes	exfoliatines	superantigens	toxins		resistance genes	resistance phenotype
ST20130944	initial WT	νSaα type III	ssl1-5, ssl7, ssl9-11			φSa3 (hlb°, 46 kb)	sak, scn, chp (IEC), entA				Tn916-like	tetM	tetracycline	8a;9b;4c;3d
		νSaβ type type III		entGNUIMO		inc. prophage (10.7-kb)		etA	dtlAB	tst	Tn552	blaIRZ	penicilin
		SaPI4				φSa2 (42.5 kb)				entA*	Tn3-like	tet	tetracycline
		SCC			type-IV (mcrBC)
ST20130945	Stable SCV	νSaα type III	ssl1-5, ssl7, ssl9-11			φSa3 (hlb°, 46 kb)	sak, scn, chp (IEC), entA				Tn916-like	tetM	tetracycline	8a;9b;4c;3d
		νSaβ type type III		entGNUIMO							Tn552	blaIRZ	penicilin
		SaPI4				inc. prophage (10.7-kb)		etA	dtlAB	tst	Tn3-like	tet	tetracycline
		SCC			type-IV (mcrBC)
