# Supplementary material for: Staphylococcus aureus Small Colony Variants (SCVs): News From a Chronic Prosthetic Joint Infection
Source: Front Cell Infect Microbiol. 2019 Oct 22;9:363. doi: 10.3389/fcimb.2019.00363 (PMC6817495; doi:10.3389/fcimb.2019.00363)
Supplement: Supplementary file 4 [file Table_4.xlsx]

## Sheet: stable SCV down regulated genes
Gene name	logFC	Gene GO enriched	protein function	logCPM	PValue	FDR	ST20130944_locus	S201309T45_locus
Arginine metabolism
arcA	-5.79685	Arginine deiminase	Arginine Desaminase Pathway	9.43328	3.56253e-91	1.90453e-88	SAST0702937	SAST0802940
arcB	-5.6053	Ornithine carbamoyltransferase catabolic	Arginine Desaminase Pathway	9.61927	4.37064e-88	1.94712e-85	SAST0704309	SAST0802939
arcD	-4.769	APC family arginine/ornithine antiporter	Arginine Desaminase Pathway	10.453	8.98864e-93	6.00666e-90	SAST0702934	SAST0802938
arcR	-4.57959	HTH type transcriptional regulator ArcR	Arginine Desaminase Pathway	9.75022	2.92855e-99	3.914e-96	SAST0702932	SAST0803203
arcC2	-4.02475	Carbamate kinase 2	Arginine Desaminase Pathway	10.1184	4.83853e-85	1.84763e-82	SAST0702933	SAST0802937
vraR/vraS
vraS	-3.30441	Sensor protein VraS	two-component regulatory system VraS/VraR involved in the control of the cell wall peptidoglycan biosynthesis	10.8469	8.07531e-56	8.63413e-54	SAST0703948	SAST0802081
vraR	-3.13791	Response regulator protein VraR	Response regulator; Member of the two-component regulatory system VraS/VraR involved in the control of the cell wall peptidoglycan biosynthesis	9.95861	8.35093e-54	8.26742e-52	SAST0703637	SAST0804598
Fatty acid metabolism (vraABCX)
vraA	-2.92285	Putative long chain fatty acid CoA ligase VraA	metabolic process ; AMP-dependent synthetase/ligase ; operon vraABX	8.2772	9.27557e-22	1.37742e-20	SAST0700603	SAST0800615
vraX	-2.49844	Protein VraX	operon vraABX	12.9643	3.29294e-29	8.00183e-28	SAST0700607	SAST0800619
vraB	-2.51674	Putative acetyl CoA C acetyltransferase VraB	metabolic process ; Metabolism; Carbohydrate metabolism; Glyoxylate and dicarboxylate metabolism, Metabolism; Overview; Fatty acid metabolism, Metabolism; Overview; Carbon metabolism, Metabolism; Lipid metabolism; Synthesis and degradation of ketone bodies, Metabolism; Carbohydrate metabolism; Pyruvate metabolism, Metabolism; Metabolism of terpenoids and polyketides; Terpenoid backbone biosynthes…	9.67461	7.03935e-18	7.87288e-17	SAST0700604	SAST0800616
vraC	-2.76038	Protein VraC		8.0756	7.21168e-24	1.24367e-22	SAST0703276	SAST0804251
Pathogenicity island associated
accD	-3.05855	Pathogenicity island protein		7.44574	1.44283e-22	2.24225e-21	SAST0702254	SAST0802232
	-2.98914	pathogenicity island protein		8.02069	3.58928e-23	5.88598e-22	SAST0703923	SAST0802233
	-2.59431	pathogenicity island protein	pathogenicity island associated	6.85794	1.27503e-19	1.67066e-18	SAST0700390	SAST0800393
	-2.58598	terminase small subunit	pathogenicity island associated	7.60633	6.98234e-26	1.36232e-24	SAST0700391	SAST0800394
	-2.46571	pathogenicity island protein		8.48899	4.15976e-12	3.16782e-11	SAST0703922	SAST0804634
	-2.39697	pathogenicity island protein		8.91923	6.31502e-14	5.55265e-13	SAST0702258	SAST0802235
	-2.36077	pathogenicity island protein	pathogenicity island associated	7.53552	1.23087e-17	1.35955e-16	SAST0700389	SAST0800392
	-2.30522	mobile element associated protein	pathogenicity island associated	8.4953	5.36146e-14	4.72977e-13	SAST0700387	SAST0800390
cadC	-2.21426	Cadmium resistance transcriptional regulatory protein CadC	pathogenicity island associated	7.95486	7.00075e-40	2.3991e-38	SAST0700754	SAST0800766
	-2.19072	pathogenicity island protein		9.03685	1.99652e-11	1.43846e-10	SAST0702257	SAST0802234
	-2.16127	pathogenicity island protein		4.49626	1.46038e-13	1.24716e-12	SAST0702250	SAST0802228
cadA	-2.07821	putative cadmium transporting ATPase	pathogenicity island associated	11.4757	3.75637e-27	8.09739e-26	SAST0700753	SAST0803473
	-2.00961	ORF007	pathogenicity island associated	8.75244	8.04147e-12	5.97079e-11	SAST0700388	SAST0800391
Glycolysis / glycolytic process
GlxK	-2.58243	glycerate kinase	glycolysis ; This protein is involved in step 2 of the subpathway that synthesizes pyruvate from D-glyceraldehyde 3-phosphate.	10.7367	8.37557e-28	1.92999e-26	SAST0702717	SAST0802712
pgk	-2.40775	Phosphoglycerate kinase	ribose phosphate metabolic process ; glycolitic process ; network with tpiA, pfkA, pgi, pgk, gapA, gapA2, tkt, pyk, eno and fba	11.4405	3.7299e-24	6.55923e-23	SAST0700867	SAST0800880
tpiA	-2.2894	Triosephosphate isomerase	glycolysis ; carbon catabolism ; gapA operon ; network with tpiA, pfkA, pgi, pgk, gapA, gapA2, tkt, pyk, eno and fba	10.9434	2.9235e-21	4.20136e-20	SAST0700868	SAST0800881
gpmI	-2.1734	2 3 bisphosphoglycerate independent phosphoglycerate mutase	ribose phosphate metabolic process ; glycolitic process ; glycolysis ; carbon catabolism ; gapA operon	11.9361	2.89999e-17	3.13833e-16	SAST0700869	SAST0800882
CtsR regulon
hrcA	-2.44665	Heat inducible transcription repressor HrcA	regulation under heat stress of genes like the entire HrcA regulon is embeddedwithin the CtsR regulon, with the synthesis of HrcA itself controlled by CtsR (13). Indeed, the CtsR protein of S. aureus binds specifically to the clpP, clpC, clpB, dnaK and groESL regulatory regions, and both CtsR and HrcA bind to the S. aureus dnaK and groESL promoter regions (13, 28)	11.5254	6.36018e-14	5.57402e-13	SAST0704008	SAST0801734
grpE	-2.41104	Protein GrpE grpE	interaction with DnaK and ClpB	10.5311	1.21995e-15	1.17723e-14	SAST0701756	SAST0803311
clpB	-2.12732	Chaperone protein ClpB	macromolecule metabolic process ; protein metabolic process ; Part of a stress-induced multi-chaperone system, it is involved in the recovery of the cell from heat-induced damage, in cooperation with DnaK, DnaJ and GrpE. Acts before DnaK, in the processing of protein aggregates. Protein binding stimulates the ATPase activity; ATP hydrolysis unfolds the denatured protein aggregates, which probably…	13.2985	2.05313e-06	8.24027e-06	SAST0700982	SAST0800996
Genes coding for non-classified proteins
	-4.74457	M23 family peptidase		7.83123	3.48945e-75	8.78674e-73	SAST0700197	SAST0800198
	-3.46561	exported protein		10.4476	1.79236e-49	1.14071e-47	SAST0702850	SAST0802851
	-3.39696	terminase		8.58764	6.05442e-23	9.63302e-22	SAST0702253	SAST0803546
	-3.09865	membrane protein		9.16379	1.37747e-40	4.97565e-39	SAST0700672	SAST0800685
prsA	-2.90643	Foldase protein PrsA	Plays a major role in protein secretion by helping the post-translocational extracellular folding of several secreted proteins	10.0413	2.95554e-44	1.38599e-42	SAST0703954	SAST0802029
	-2.85994	membrane protein		5.65433	1.01106e-50	8.44555e-49	SAST0704076	SAST0804945
RNA methyltransferase	-2.74984	Uncharacterized RNA methyltransferase SAR1988 SAR1988	RNA synthesis	10.3094	6.1262e-46	3.21085e-44	SAST0702118	SAST0802097
	-2.67593	Permease		10.3976	1.11205e-41	4.308e-40	SAST0702117	SAST0802096
	-2.58138	UPF0758 protein MW1604 MW1604		6.00721	8.40196e-43	3.62233e-41	SAST0701833	SAST0801810
murA2	-2.43992	UDP N acetylglucosamine 1 carboxyvinyltransferase 2	peptidoglycan biosynthetic process ; regulation of cell shape ; peptidoglycan-based cell wall biogenesis	10.3314	3.07064e-37	1.01331e-35	SAST0702378	SAST0802354
hxlR	-2.42089	hxlR like helix turn helix family protein		9.99147	2.11156e-24	3.83959e-23	SAST0703707	SAST0804673
azoR	-2.40572	FMN dependent NADH azoreductase	oxidation-reduction process ; oxidoreductase activity, acting on other nitrogenous compounds as donors	6.30715	8.87225e-43	3.76437e-41	SAST0700196	SAST0800197
	-2.2426	transcriptional regulator		3.00513	3.23403e-10	2.05334e-09	SAST0700354	SAST0800357
	-2.19824	UPF0457 protein SA1975.1		6.13562	6.69382e-18	7.5179e-17	SAST0702434	SAST0802412
ImpB/MucB/SamB	-2.19189	ImpB/MucB/SamB family protein		6.68866	4.38423e-40	1.56254e-38	SAST0704063	SAST0801468
msmX	-2.11601	Maltodextrin import ATP binding protein MsmX	hydrolase activity, acting on acid anhydrides, catalyzing transmembrane movement of substances ; ATPase activity ; sugar (maltose) transport operon	4.60444	1.27043e-27	2.90245e-26	SAST0700200	SAST0800201
tcaA	-2.06197	Membrane associated protein TcaA		8.59522	9.85837e-24	1.67843e-22	SAST0702629	SAST0803243
ferritin DPS family	-2.06038	Ferritin Dps family protein	stress response	11.5734	3.97187e-10	2.49807e-09	SAST0702395	SAST0802372
cidA	-2.02225	Holin like protein CidA	Increases the activity of extracellular murein hydrolases possibly by mediating their export via hole formation. Inhibited by the antiholin-like proteins LrgAB. In an unstressed cell, the LrgAB products probably inhibit the function of the CidAB proteins. When a cell is stressed by the addition of antibiotics or by other factors in the environment, the CidAB proteins possibly oligomerize within t…	7.5791	1.4908e-27	3.34867e-26	SAST0703807	SAST0805150
cspLA	-1.99705	Cold shock like protein CspLA	near recF and gyrB	10.7235	9.3074e-24	1.59479e-22	SAST0703076	SAST0804115
acetolactase	-1.99678	putative acetolactate synthase		10.9994	2.48735e-19	3.15103e-18	SAST0702474	SAST0802456
Genes coding for hypothetical proteins
	-3.78142	hypothetical protein		10.1616	1.41716e-34	4.11747e-33	SAST0703575	SAST0804474
	-3.60878	hypothetical protein		9.89295	1.40972e-53	1.34578e-51	SAST0703947	SAST0804599
	-3.42337	hypothetical protein		9.32638	1.88874e-33	5.37084e-32	SAST0703574	SAST0804475
	-3.38064	hypothetical protein		7.98445	2.80739e-56	3.12673e-54	SAST0702105	SAST0802083
	-3.01549	hypothetical protein		10.2501	4.26897e-42	1.70313e-40	SAST0704345	SAST0802713
	-2.97398	hypothetical protein		0.898799	1.01284e-10	6.81942e-10	SAST0700601	SAST0800613
	-2.48891	hypothetical protein	operon vraABX	8.64443	4.2919e-22	6.51833e-21	SAST0700606	SAST0800618
	-2.47805	hypothetical protein		8.98677	6.95375e-40	2.3991e-38	SAST0702587	SAST0802573
	-2.16902	hypothetical protein		5.88645	4.815e-09	2.64281e-08	SAST0702715	SAST0802710

## Sheet: stable SCV up regulated genes
Gene name	logFC	Gene GO enriched	protein function	logCPM	PValue	FDR	ST20130944_locus	S201309T45_locus
PSM
hld	4.39771	Delta hemolysin hld	virulence gene	9.54768	2.01231e-70	4.48242e-68	SAST0702277	SAST0802252
psmA1	3.40006	Phenol soluble modulin alpha 1 peptide	virulence gene ; recent research has demonstrated that numerous bacterial species utilize the amyloid fold to fortify the biofilm matrix and resist disassembly. c phenol soluble modulin α1, a major component of Staphylococcus aureus functional amyloids. As it aggregates phenol soluble modulin α1 adopts α-helix then α-sheet and finally forms β-sheet fibrils. Blem et al. 2017 ; The cytotoxic Staphy…	4.53212	2.73556e-24	4.90749e-23	SAST0700465	SAST0800471
psmA2	2.89503	Phenol soluble modulin alpha 2 peptide	virulence gene	3.7159	5.83158e-20	7.83307e-19	SAST0700464	SAST0800470
psmA3	2.88835	Phenol soluble modulin alpha 3 peptide	virulence gene ; recent research has demonstrated that numerous bacterial species utilize the amyloid fold to fortify the biofilm matrix and resist disassembly. c phenol soluble modulin α1, a major component of Staphylococcus aureus functional amyloids. As it aggregates phenol soluble modulin α1 adopts α-helix then α-sheet and finally forms β-sheet fibrils. Blem et al. 2017 ; The cytotoxic Staphy…	4.68438	6.2096e-18	7.00349e-17	SAST0700463	SAST0800469
agr system
agrB	2.54914	Accessory protein regulator protein B	agr locus ; regulation virulence	9.83131	1.78573e-28	4.26183e-27	SAST0703679	SAST0804640
agrD	2.43112	AgrD	agr locus ; regulation virulence	7.56195	4.69104e-38	1.56739e-36	SAST0702279	SAST0802254
agrC	2.19064	autoinducer sensor protein agrC	agr locus ; regulation virulence	10.364	2.53582e-23	4.2101e-22	SAST0703680	SAST0804641
agrA	2.0315	Accessory protein regulator protein A	agr locus ; regulation virulence	9.651	4.1262e-24	7.16191e-23	SAST0703681	SAST0804642
Other virulence factors
clfA	3.33252	Clumping factor A	virulence gene ; binds to fibrinogen	13.1036	6.01169e-57	7.30421e-55	SAST0700882	SAST0800895
nuc	2.18507	Thermonuclease nuc	exoenzyme that could hydrolyze DNA and RNA in host cells, causing tissue destruction and spreading of S. aureus (Sandel and McKillip 2004; Foster 2005)	6.47721	3.93473e-46	2.25401e-44	SAST0700887	SAST0800902
Capsule
capB	4.00455	Putative tyrosine protein kinase CapB capB	capsule	8.45117	3.24422e-43	1.4453e-41	SAST0700139	SAST0800140
capA	4.00213	Capsular polysaccharide type 5 biosynthesis protein cap5A cap5A	capsule	8.12365	5.78595e-40	2.03498e-38	SAST0700138	SAST0800139
capO	3.92309	capsular polysaccharide synthesis enzyme capO	capsule	9.36179	6.43465e-79	1.91109e-76	SAST0700152	SAST0800153
capC	3.87271	capsular polysaccharide synthesis enzyme capC capC	capsule	8.59337	1.2218e-30	3.11034e-29	SAST0700140	SAST0800141
capI	3.80838	capsular polysaccharide synthesis enzyme cap8I	capsule	8.42896	6.217e-43	2.72427e-41	SAST0700146	SAST0800147
capJ	3.79075	capsular polysaccharide synthesis enzyme CapJ cap8J	capsule	7.23788	4.00156e-46	2.25401e-44	SAST0700147	SAST0800148
capG	3.78658	UDP N acetylglucosamine 2 epimerase capG capG	capsule	8.79625	3.43481e-31	9.00123e-30	SAST0700144	SAST0800145
capL	3.75638	Capsular polysaccharide synthesis enzyme	capsule	8.97079	1.19569e-56	1.3896e-54	SAST0703177	SAST0804070
capK	3.74069	capsular polysaccharide synthesis enzyme cap8K	capsule	8.08392	3.0434e-51	2.71167e-49	SAST0700148	SAST0800149
capF	3.69057	Capsular polysaccharide synthesis enzyme Cap8F	capsule	8.95205	2.78026e-25	5.23355e-24	SAST0703175	SAST0804152
capK	3.68631	capsular polysaccharide synthesis enzyme	capsule	9.39695	3.31958e-24	5.91549e-23	SAST0703174	SAST0804151
capM	3.65792	capsular polysaccharide biosynthesis galactosyltransferase Cap5M cap5M	capsule	7.40851	1.3848e-54	1.42368e-52	SAST0700150	SAST0800151
capH	3.65357	capsular polysaccharide synthesis enzyme cap8H	capsule	7.56503	1.09746e-44	5.5349e-43	SAST0704277	SAST0805108
capN	3.6356	capsular polysaccharide synthesis enzyme capN	capsule	8.51515	3.63228e-69	6.47272e-67	SAST0700151	SAST0800152
capE	3.51317	capsular polysaccharide synthesis enzyme Cap8E	capsule	8.71656	4.58907e-23	7.38951e-22	SAST0700142	SAST0800143
capP	3.46702	UDP N acetylglucosamine 2 epimerase	capsule	9.08257	3.03852e-70	6.24767e-68	SAST0700153	SAST0800154
Iron transport
	3.85248	asp23 family protein	siderophore iron transport	11.5246	3.18619e-50	2.24124e-48	SAST0703724	SAST0804692
asp23	3.66939	Alkaline shock protein 23 asp23	next siderophore Ion transport	12.3761	1.52597e-50	1.23603e-48	SAST0703885	SAST0802424
	3.63438	small integral membrane protein protein	siderophore iron transport	8.81111	1.29561e-61	1.82272e-59	SAST0702446	SAST0802425
sirC	2.67043	Iron compound ABC superfamily ATP binding cassette transporter permease protein SirC	iron transport	8.74087	2.36305e-36	7.3447e-35	SAST0700101	SAST0800101
	2.57113	IucA/IucC family aerobactin biosynthesis protein	siderophore iron transport ; IucA and IucC catalyse discrete steps in biosynthesis of the siderophore aerobactin	9.11004	2.37502e-44	1.13365e-42	SAST0702444	SAST0802423
	2.25983	major facilitator superfamily transporter MFS 1	siderophore iron transport	7.48724	1.29563e-51	1.19421e-49	SAST0703723	SAST0804691
Copper transport
copZ	4.24826	Copper chaperone CopZ copZ	copper transport	9.32414	1.45785e-95	1.29894e-92	SAST0704321	SAST0805143
copB	3.36273	putative copper transporting P type ATPase B	in transposon element	9.3854	2.32426e-64	3.65455e-62	SAST0703317	SAST0804286
	2.91468	multicopper oxidase		8.37538	2.74156e-50	2.03561e-48	SAST0704179	SAST0804287
pH homeostasis (Na+/H+ antiporter)
mnhF2	2.2808	Putative antiporter subunit mnhF2	Na+/H+ antiporter encoded by a cluster of six or seven genes that probably form a multisubunit transport complex. The Sha system is important for the homeostasis of H+, Na+, and other monovalent cations and plays a critical role in various functions, including alkaliphily	6.0372	4.13811e-22	6.32067e-21	SAST0700661	SAST0800674
mnhB2	2.79619	Putative antiporter subunit mnhB2	Na+/H+ antiporter encoded by a cluster of six or seven genes that probably form a multisubunit transport complex. The Sha system is important for the homeostasis of H+, Na+, and other monovalent cations and plays a critical role in various functions, including alkaliphily	6.66199	1.0679e-42	4.39155e-41	SAST0700657	SAST0800670
mnhA2	2.69017	Putative antiporter subunit mnhA2	Na+/H+ antiporter encoded by a cluster of six or seven genes that probably form a multisubunit transport complex. The Sha system is important for the homeostasis of H+, Na+, and other monovalent cations and plays a critical role in various functions, including alkaliphily	9.31124	4.03163e-37	1.31421e-35	SAST0703290	SAST0804263
MrpD	2.61518	MrpD protein	Na+/H+ antiporter encoded by a cluster of six or seven genes that probably form a multisubunit transport complex. The Sha system is important for the homeostasis of H+, Na+, and other monovalent cations and plays a critical role in various functions, including alkaliphily	8.52209	1.60765e-28	3.87139e-27	SAST0703291	SAST0804264
mnhc2	2.18393	Putative antiporter subunit mnhC2	Na+/H+ antiporter encoded by a cluster of six or seven genes that probably form a multisubunit transport complex. The Sha system is important for the homeostasis of H+, Na+, and other monovalent cations and plays a critical role in various functions, including alkaliphily	5.62211	4.31903e-23	7.0395e-22	SAST0700658	SAST0800671
mnhG2	2.0805	Putative antiporter subunit mnhG2	Na+/H+ antiporter encoded by a cluster of six or seven genes that probably form a multisubunit transport complex. The Sha system is important for the homeostasis of H+, Na+, and other monovalent cations and plays a critical role in various functions, including alkaliphily	6.40839	9.34944e-16	9.12082e-15	SAST0700662	SAST0800675
mnhE2	2.01333	Putative antiporter subunit mnhE2	Na+/H+ antiporter encoded by a cluster of six or seven genes that probably form a multisubunit transport complex. The Sha system is important for the homeostasis of H+, Na+, and other monovalent cations and plays a critical role in various functions, including alkaliphily	5.64606	1.84212e-14	1.67483e-13	SAST0700660	SAST0800673
Flavin / merA operon
ribE	2.31041	riboflavin synthase	merA operon ; riboflavin biosynthetic process ; Purine metabolism	6.04314	1.09114e-41	4.28916e-40	SAST0701963	SAST0801938
ribBA	2.45196	Riboflavin biosynthesis protein RibBA	merA operon ; riboflavin biosynthetic process ; Purine metabolism	7.04275	4.75818e-50	3.26119e-48	SAST0701962	SAST0801937
ribD	2.3892	diaminohydroxyphosphoribosylaminopyrimidine deaminase	merA operon	7.66817	1.00003e-50	8.44555e-49	SAST0703599	SAST0804453
namA	2.30297	NADH:flavin oxidoreductase/NADH oxidase family protein	oxidation-reduction process ; NADH:flavin oxidoreductase/NADH oxidase ; operon of luciferase	8.87431	1.99001e-22	3.05707e-21	SAST0700325	SAST0800327
merA	2.23867	pyridine nucleotide disulfide oxidoreductase	merA operon ; pyridine nucleotide-disulphide oxidoreductases are FAD flavoproteins which contain a pair of redox-active cysteines involved in the transfer of reducing equivalents from the FAD cofactor to the substrate ; Selenocompound metabolism	6.86245	1.99513e-44	9.69631e-43	SAST0703984	SAST0801940
ribH	2.22804	6 7 dimethyl 8 ribityllumazine synthase ribH	merA operon ; riboflavin biosynthetic process ; Purine metabolism	5.75724	8.18534e-36	2.4863e-34	SAST0701961	SAST0801936
	2.14032	flavoprotein oxygenase DIM6/NTAB family protein	flavoprotein oxygenase ; oxidation-reduction processes	6.10845	2.46366e-41	9.40764e-40	SAST0702967	SAST0802972
Pathogenicity island associated
	3.4584	pathogenicity island protein	pathogenicity island associated	8.99617	3.61594e-75	8.78674e-73	SAST0700394	SAST0800397
	2.44587	propeptide	pathogenicity island associated	9.44201	5.45022e-32	1.47156e-30	SAST0700399	SAST0800402
Membrane proteins
	2.237	membrane protein		6.88401	9.97605e-43	4.16656e-41	SAST0700893	SAST0800908
	4.87544	membrane protein		5.55907	1.82688e-44	9.04304e-43	SAST0700880	SAST0800893
	3.30079	membrane protein		6.11555	2.34969e-83	7.85092e-81	SAST0703228	SAST0804202
	2.71318	membrane protein		7.27081	8.62482e-107	2.30542e-103	SAST0703828	SAST0805139
	2.5432	membrane protein		6.45649	8.19662e-47	5.09525e-45	SAST0704156	SAST0804320
Glycolysis / Gluconeogenesis
fda	2.02439	Fructose bisphosphate aldolase class 1	Glycolysis / Gluconeogenesis; ribose phosphate metabolic process ; nicotinamide nucleotide metabolic process	12.6289	4.81889e-18	5.57614e-17	SAST0702901	SAST0802904
yvgN	2.95047	Glyoxal reductase	Glycogenesis ; Operon with glyoxal reductase ?; chornic inflamation response	8.09044	9.019e-60	1.20539e-57	SAST0703329	SAST0804301
gbsA	2.895	Betaine aldehyde dehydrogenase	L-lactate dehydrogenase activity ; Pyruvate metabolism ; Glycolysis / Gluconeogenesis ; network with katA, betA	9.0007	2.8594e-50	2.06572e-48	SAST0702907	SAST0802910
yfdH	2.49453	glucosyl transferase	Glycogenesis ; Operon with glyoxal reductase ?; chornic inflamation response	8.63065	6.93419e-41	2.57432e-39	SAST0700789	SAST0800801
Genes coding for non-classified proteins
dapE	2.91586	putative succinyl diaminopimelate desuccinylase	arginine metabolic process ; glutamine family amino acid biosynthetic process ; alpha-amino acid biosynthetic process	9.1762	4.30927e-39	1.45806e-37	SAST0702243	SAST0802222
opuD	4.33823	BCCT family osmoprotectant transporter opuD	Glycine betaine transporter ; near iron operonupregulated ; accumulation of the osmoprotectant glycine betaine from exogenous sources provides a high degree of osmotic tolerance to Bacillus subtilis. (Kappes et al. 1996. Jbac)	9.22346	1.02909e-63	1.5282e-61	SAST0702448	SAST0803267
lip2	4.3003	Lipase 2 lip2	lipid catabolic process ; chemical reactions and pathways resulting in the breakdown of lipids, compounds soluble in an organic solvent ; co-ocurrence qith sspA ; splC and splF	13.781	2.2456e-43	1.01737e-41	SAST0704253	SAST0805087
	3.67602	Putative cytosolic protein		10.103	1.97328e-69	3.76755e-67	SAST0703087	SAST0804083
	3.32042	UPF0337 protein SA1452 SA1452		9.86968	5.02525e-50	3.35812e-48	SAST0701804	SAST0804907
	3.24448	hemolytic family protein		6.64964	1.84152e-36	5.85998e-35	SAST0701200	SAST0801239
csbD	3.08236	UPF0337 protein SAV0840 SAV0840		11.0247	5.39324e-46	2.88323e-44	SAST0700913	SAST0800927
	2.88519	myosin cross reactive antigen		9.42104	2.01114e-50	1.58111e-48	SAST0703157	SAST0804135
	2.88405	integral membrane protein	transglycosylase associated family protein	9.99188	3.81961e-36	1.17354e-34	SAST0700401	SAST0800404
	2.85837	amino acid permease		10.9658	1.88635e-29	4.6687e-28	SAST0700614	SAST0800626
OsmC/Ohr	2.8456	Organic hydroperoxide resistance protein like protein SAR0859	thiol-dependent peroxidases that comprise a family of prokaryotic protective proteins central to the defense against deleterious effects of organic hydroperoxides, stress response	8.22615	9.36636e-68	1.56477e-65	SAST0700900	SAST0800914
hchA	2.70849	Molecular chaperone Hsp31 and glyoxalase 3	Protein deglycase that repairs methylglyoxal- and glyoxal-glycated proteins, and releases repaired proteins and lactate or glycolate, respectively. Deglycates cysteine, arginine and lysine residues in proteins, and thus reactivates these proteins by reversing glycation by glyoxals. Is able to repair glycated serum albumin, aspartate aminotransferase, glyceraldehyde-3-phosphate dehydrogenase, and …	8.76683	8.00979e-33	2.23022e-31	SAST0700574	SAST0803531
	2.57835	Radical activating enzyme protein	ROS oxidative stress	8.99784	4.61438e-46	2.51719e-44	SAST0701102	SAST0803454
betA	2.51186	Choline dehydrogenase	glycine, serine and threonine metabolism ; glycine, serine and threonine metabolism ; acting on the aldehyde or oxo group of donor with NAD+ or NADP+ as acceptor ; Involved in the biosynthesis of the osmoprotectant glycine betaine. Catalyzes the oxidation of choline to betaine aldehyde and betaine aldehyde to glycine betaine at the same rate ; Fatty acid degradation ;	7.86647	2.3355e-46	1.38729e-44	SAST0702906	SAST0802909
	2.50598	alpha/beta hydrolase fold family hydrolase		9.98125	6.42905e-21	8.9973e-20	SAST0700648	SAST0800659
	2.49647	exported protein		8.05024	1.8544e-25	3.51548e-24	SAST0700445	SAST0800451
	2.49593	MAP domain containing protein		7.33019	2.576e-41	9.69811e-40	SAST0702471	SAST0802453
	2.46088	Putative lipid kinase SAR0780 SAR0780		8.71204	2.54011e-45	1.30572e-43	SAST0700812	SAST0800823
	2.43811	phage integrase family integrase/recombinase		6.22311	3.04032e-42	1.23133e-40	SAST0700655	SAST0803521
	2.41428	TM2 domain containing protein		6.5837	2.41853e-50	1.84706e-48	SAST0701055	SAST0801071
	2.40733	Epimerase family protein SAR0825 SAR0825		7.36428	3.85772e-58	4.91033e-56	SAST0700862	SAST0800875
	2.4068	NAD dependent dehydrogenase	NAD dehydorgenase ; oxidation-reduction processes	8.26766	4.0476e-46	2.25401e-44	SAST0702400	SAST0803574
glmU	2.36007	Glucosamine 1 phosphate acetyltransferase	aminosugars metabolism ; cell wall components ; glucosamine-1-phosphate N-acetyltransferase activity ; peptidoglycan biosynthetic process	3.78259	3.96585e-27	8.48057e-26	SAST0700516	SAST0800525
hutG	2.35291	Formimidoylglutamase	histidine metabolism ; arbon-nitrogen bonds other than peptide bonds, specifically in linear amidines	9.34901	1.07854e-29	2.69432e-28	SAST0704353	SAST0802588
	2.33423	short chain dehydrogenase	lipid catabolism ; oxidation-reduction processes ?	8.04567	1.30831e-40	4.79058e-39	SAST0702761	SAST0802756
	2.25312	transcriptional regulator		9.10301	2.49589e-35	7.49608e-34	SAST0703233	SAST0804207
	2.22406	tetrapyrrole corrin/porphyrin methylase	oxidation-reduction process ; porphyrin-containing compound biosynthetic process ; rRNA methylation ; ribosome biogenesis	9.64587	1.33743e-25	2.5719e-24	SAST0702679	SAST0802671
	2.20411	Uncharacterized protein SAR1965 SAR1965		9.00025	2.54022e-35	7.54445e-34	SAST0702091	SAST0802070
	2.17042	ABC transporter ATP binding protein		6.84321	7.42922e-33	2.09035e-31	SAST0702744	SAST0802738
nrdG	2.05956	Anaerobic ribonucleoside triphosphate reductase	anaerobiosis ; oxidation-reduction process ; glycine, serine and threonine metabolism ?	11.7696	4.39669e-16	4.37726e-15	SAST0702914	SAST0803206
Genes coding for hypothetical proteins
	3.16226	hypothetical protein		8.55934	1.79174e-49	1.14071e-47	SAST0701803	SAST0803305
	3.1314	hypothetical protein		6.39935	1.22079e-43	5.62617e-42	SAST0704132	SAST0801118
	2.79568	hypothetical protein	operon of luciferase	3.12945	1.15783e-20	1.5953e-19	SAST0700326	SAST0800328
	2.40587	hypothetical protein		8.10622	1.57703e-46	9.58048e-45	SAST0700761	SAST0800773
	2.40302	hypothetical protein		2.17864	4.40509e-16	4.37726e-15	SAST0700879	SAST0800892
	2.37049	hypothetical protein		4.07419	2.41997e-27	5.34594e-26	SAST0703822	SAST0804791
	2.26609	hypothetical protein		5.55209	9.82233e-37	3.16326e-35	SAST0702144	SAST0802123
	2.25677	hypothetical protein		3.60672	3.44659e-26	6.87517e-25	SAST0703823	SAST0804792
	2.11949	hypothetical protein		4.43229	8.62823e-26	1.67125e-24	SAST0700159	SAST0800160
	2.09276	hypothetical protein		3.81735	4.14474e-27	8.79276e-26	SAST0700653	SAST0800664
	2.01726	hypothetical protein		-0.162623	0.0017167	0.00417539	SAST0702908	SAST0802911
